# Supplementary material
Source: PubMed Central journal article supplement (PMC2148503)

## Supplementary Materials

### Figure Captions

#### Supplementary Figure 1.

(A) The DNA sequence of the synthetic gene coding for cAb-RN05 V<sub>H</sub>H. The locations of CDR1, 2 and CDR3 are indicated as bars.

(B) A schematic drawing of the yeast surface display vector for cAb-RN05 V<sub>H</sub>H used in this work.

**Supplementary Figure 2.** Water molecules found near the V<sub>H</sub>H-RNaseA interface in the wild-type (A) and affinity-matured (B) complexes, depicted in stereoview. The V<sub>H</sub>H and RNaseA backbone shown as ribbons are colored in cyan and pink, respectively. The water molecules that are found at the complex interface (14 and 13 molecules in panel A and B, respectively) are represented as a green spheres. Two spines of H-bonded water molecules are found and they are denoted as connected green bonds. The water molecules that form H-bonds to both V<sub>H</sub>H and RNaseA residues are shown as larger and labeled (w1-w4 and w1-w5 in panel A and B, respectively). The protein residues that are involved in the interactions at the complex interface are shown as ball-and-stick models and labeled. Nitrogen and oxygen atoms are in blue and in red, respectively. Carbon atoms and covalent bonds involving a carbon atom are colored gray and yellow for V<sub>H</sub>H and RNaseA residues, respectively. The hydrogen bonds involving the protein residues are shown as dotted lines: water-protein and protein-protein interactions are in green and gray, respectively. The positions of ten water molecules (shown in bright green) are conserved (shift < 0.7 Å). The H-bond distances are within 2.6-3.4 Å and they are listed in Tables S1-S2. One of the two complexes in the asymmetric unit in the crystals of the affinity matured V<sub>H</sub>H (chains A and B) is selected for presentation. The second conformation found for RNaseA residues S59 (panel A) and Y76 (panel B) is shown in gray.

**Table S1.** Direct H-bonds at the V<sub>H</sub>H-RNaseA interface

| V <sub>H</sub> H                         |      | RNaseA  |      | Distance (Å) |        |
|------------------------------------------|------|---------|------|--------------|--------|
| Residue                                  | Atom | Residue | Atom | Wild-Type    | Mutant |
| <i>Between V<sub>H</sub>H and RNaseA</i> |      |         |      |              |        |
| <i>CDR1</i>                              |      |         |      |              |        |
| Y27                                      | OH   | Q60     | O    | 3.45         | 2.62   |
| Y27                                      | OH   | N62     | N    | 2.80         | 2.86   |
| I32                                      | N    | N62     | OD1  | 2.96         | 2.90   |
| <i>CDR3</i>                              |      |         |      |              |        |
| G95                                      | O    | Y73     | OH   | 2.65         | 2.96   |
| G95                                      | O    | Y115    | OH   | 3.33         | 3.25   |
| G96                                      | O    | T70     | OG1  | 2.73         | 2.69   |
| R100bT                                   | O    | G112    | N    | 2.89         | 2.86   |
| T100cR                                   | O    | Y115    | OH   | 2.71         | 2.61   |
| R100b                                    | NE   | E111    | OE1  | 3.32         | —*     |
| T100cR                                   | NE   | E111    | OE1  | —*           | 3.06   |
| <i>Within V<sub>H</sub>H</i>             |      |         |      |              |        |
| Y97D                                     | OD2  | T100cR  | NH2  | —*           | 2.88   |
| R45                                      | NE   | D100a   | OD2  | 2.92         | —*     |
| R45                                      | NH2  | D100a   | OD1  | 2.30         | —*     |
| <i>Within RNaseA</i>                     |      |         |      |              |        |
| N71                                      | ND2  | G110    | O    | 2.97         | 2.83   |
| N71                                      | OD1  | Q69     | NE2  | 3.03         | 2.80   |
| Q69                                      | OE1  | N67     | ND2  | 2.81         | 3.24   |
| Q69                                      | N    | N67     | OD1  | 2.84         | 2.97   |

\*Present only in one structure

**Table S2.** Single water mediated H-bonds (Å) between V<sub>H</sub>H and RNaseA at the complex interface as depicted in Figure S1.

| Water molecule | Protein          | Residue | Atom | Distance (Å)      |        |
|----------------|------------------|---------|------|-------------------|--------|
|                |                  |         |      | Wild Type         | Mutant |
| w1             | V <sub>H</sub> H | Y33     | N    | 2.85              | 2.86   |
|                | V <sub>H</sub> H | G96     | O    | 2.88              | 2.86   |
|                | V <sub>H</sub> H | G96     | N    | 3.30 <sup>#</sup> | 2.92   |
|                | RNaseA           | N62     | OD1  | 2.69              | 2.86   |
|                | RNaseA           | T70     | O    | 3.17              | 2.87   |
| w2             | V <sub>H</sub> H | T30     | O    | 2.69              | 2.55   |
|                | V <sub>H</sub> H | T30     | N    | 3.57 <sup>#</sup> | 3.26   |
|                | RNaseA           | N62     | O    | 2.79              | 2.69   |
| w3             | V <sub>H</sub> H | A95     | O    | 2.95              | 2.80   |
|                | V <sub>H</sub> H | G95     | O    | 3.89 <sup>#</sup> | 2.86   |
|                | RNaseA           | Y73     | OH   | 2.70              | 2.77   |
| w4             | V <sub>H</sub> H | Y100d   | O    | 3.24              | 2.93   |
|                | RNaseA           | G112    | O    | 2.65              | 2.80   |

<sup>#</sup>The distance is longer than the H-bond length cutoff (3.5 Å) or the Donor-H···Acceptor angle is smaller than H-bond angle cutoff (100°).

**A**

```

CAAGTACAACCTGGTAGAAAGCGGTGGTGGTCTGGTACAAGCAGGTGGTAGCCTGCGTCTG
Q V Q L V E S G G G L V Q A G G S L R L
1 10 20
AGCTGCGCAGCAAGCGGTTACGCATACACCTACATCTACATGGGTTGGTCCGTCAAGCA
S C A A S G Y A Y T Y I Y M G W F R Q A
CDR1 30 40
CCAGGTAAAGAACGTGAAGGTGTAGCAGCAATGGACAGCGGTGGTGGTACTCTGTAC
P G K E R E G V A A M D S G G G G T L Y
50 52 52a CDR2
GCAGACAGCGTAAAAGGTCGTTTCACCATCAGCCGTGACAAAGGTAAAAACACCGTATAC
A D S V K G R F T I S R D K G K N T V Y
60 70
CTGCAGATGGACAGCCTGAAACCAGAAGACACCGCAACCTACTACTGCGCAGCAGGTGGT
L Q M D S L K P E D T A T Y Y C A A G G
80 83 83a b c 84 90
TACGAACTGCGTGACCGTACCTACGGTCAATGGGGTCAAGGCACCCAAGTAACCGTAAGC
Y E L R D R T Y G Q W G Q G T Q V T V S
CDR3 100 a b c d 101 110
AGCGGTGGC
S G G

```

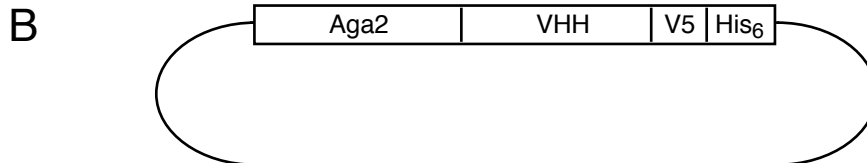

Supplementary Figure 1. Koide et al.

**A**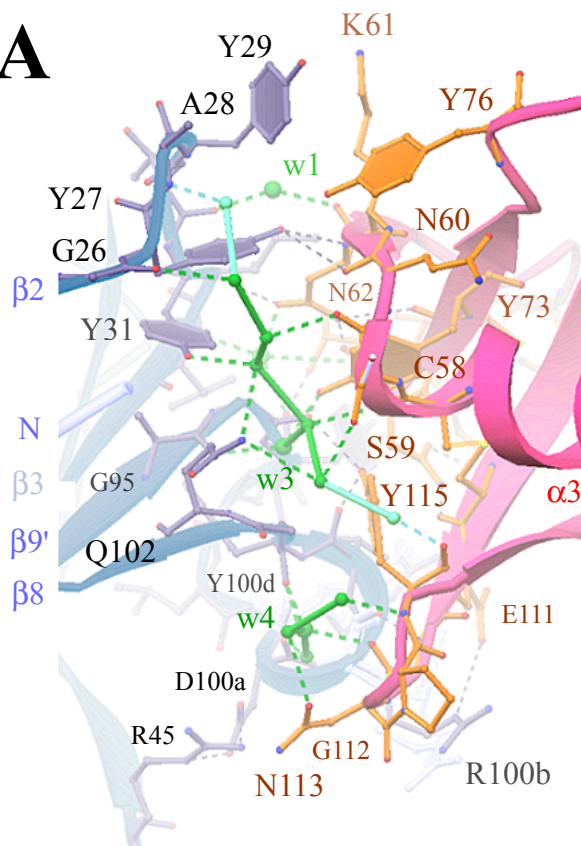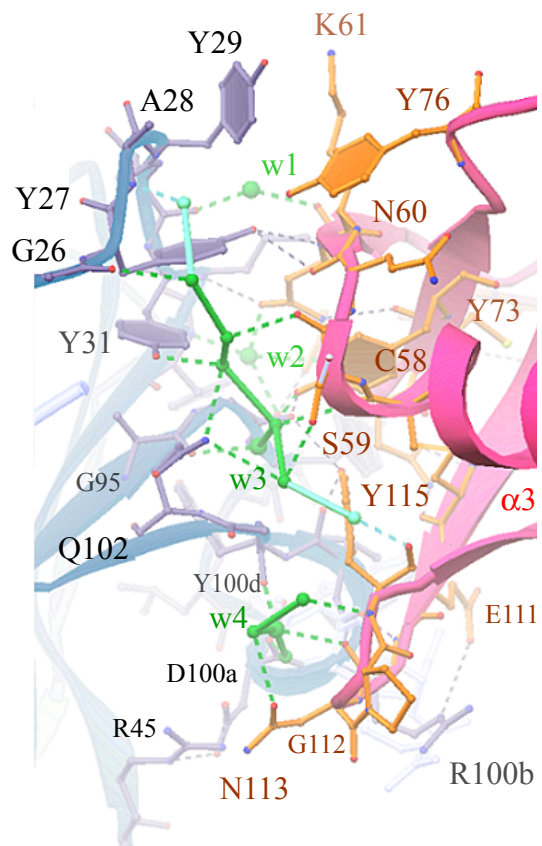**B**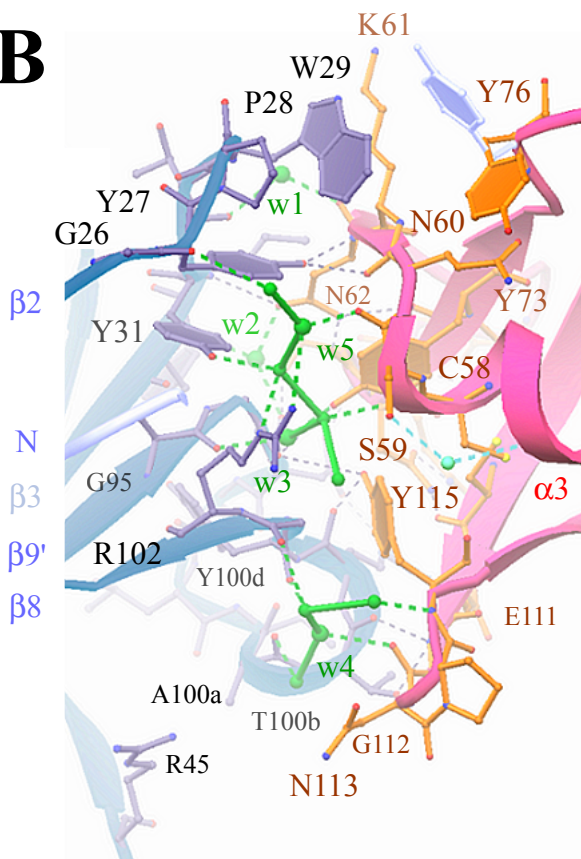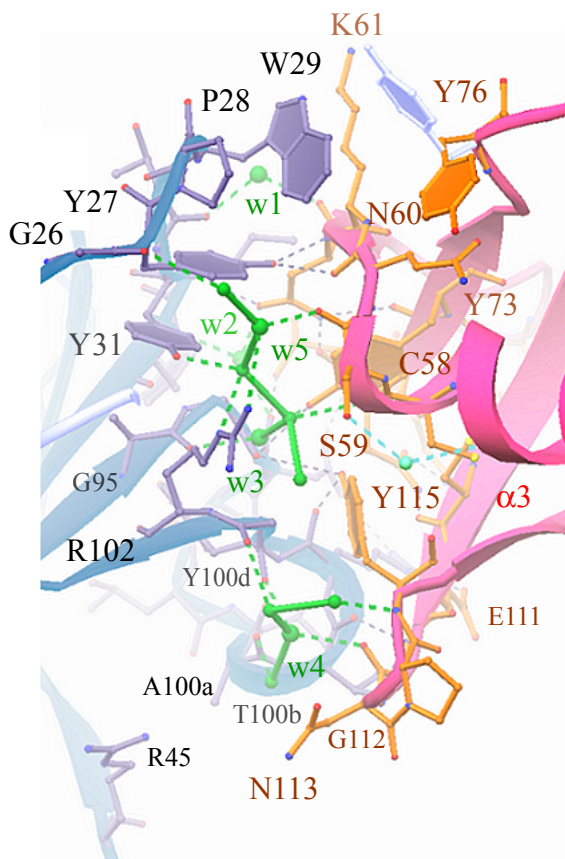

Supplement: NIHMS32824-supplement-01.pdf [file NIHMS32824-supplement-01.pdf]
